# Supplementary material
Source: MDPI journal article supplement (https://www.mdpi.com/search?q=ijms-15-07987)
Supplement: s001 [file ijms-15-07987-s001.pdf]

# Supplementary Information

**Figure S1.** Forest plot of CAD risk associated with the eNOS 4ba polymorphism by ethnicity (homozygote comparison).

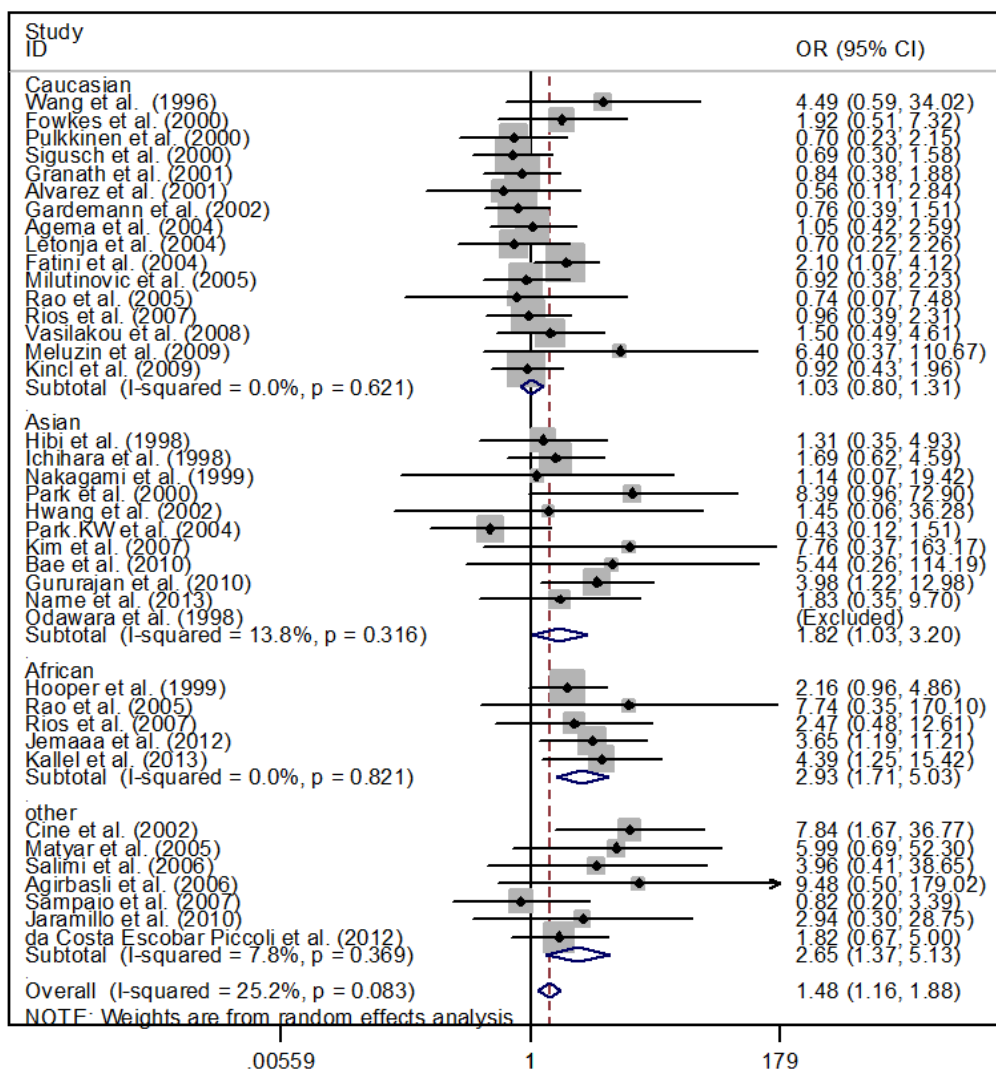

**Figure S2.** Influence analysis of the summary odds ratio coefficients on the association for the eNOS 4ba genotype with CAD risk.

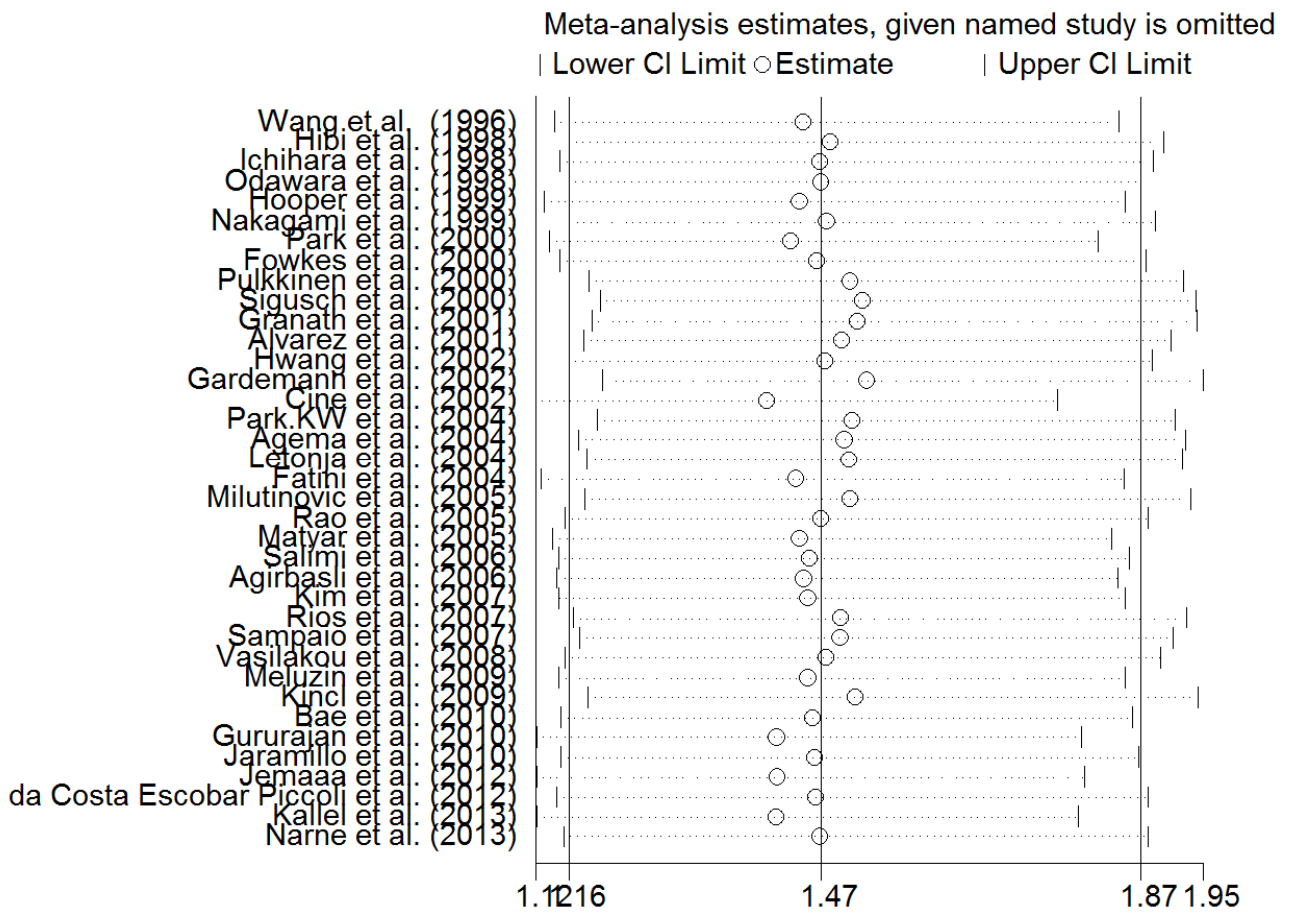

© 2014 by the authors; licensee MDPI, Basel, Switzerland. This article is an open access article distributed under the terms and conditions of the Creative Commons Attribution license (<http://creativecommons.org/licenses/by/3.0/>).
